# Supplementary material for: Hydrothermal synthesis and controlled growth of group-VIB W metal compound nanostructures from tungsten oxide to tungsten disulphide
Source: Royal Society of Chemistry journal article supplement (doi:10.1039/d2nr03786f), 2022-01-01
Supplement: d2nr03786f1.pdf [file d2nr03786f1.pdf]

## Supporting Information

### Hydrothermal synthesis and controlled growth of group-VIB W metal compound nanostructures from tungsten oxide to tungsten disulphide

Xue Wang<sup>1</sup>, Cheng-Bao Yao<sup>1,\*</sup>, Li-Yuan Wang<sup>1</sup>, Ze-Miao Wang<sup>1</sup>, Cai-Hong Jiang<sup>1</sup> and Xiao-Jie Liu<sup>1,\*</sup>

<sup>1</sup>Key Laboratory of Photonic and electric Bandgap materials, Ministry of Education, School of Physics and Electronic Engineering, Harbin Normal University, Harbin, 150025, Heilongjiang Province, China

\*Corresponding author: yaochengbao5@163.com, 378599603@qq.com

#### 1. Hydrothermal conditions for sample preparation

##### (i) WO<sub>3</sub> nanorods.

WO<sub>3</sub> nanorods were prepared at different reactant concentration for different temperatures and varying reaction time, respectively. Reactant concentration was changed while controlling other conditions at 240 °C and 12 h, to obtain the three samples termed as WO<sub>3</sub>-C1, WO<sub>3</sub>-C2 and WO<sub>3</sub>-C3 nanorods, corresponding to the millimolar ratios of C<sub>2</sub>H<sub>5</sub>NS to WCl<sub>6</sub> is 10 : 2, 15 : 3 and 20 : 4, separately. When millimolar ratios of C<sub>2</sub>H<sub>5</sub>NS to WCl<sub>6</sub> is 15 : 3, the hydrothermal reactions were carried out at 220 °C, 240 °C and 260 °C for 12 h, respectively. And the samples were marked as WO<sub>3</sub>-T1, WO<sub>3</sub>-T2 and WO<sub>3</sub>-T3 nanorods. Under the reaction conditions at 260 °C and 15 : 3, the reaction time was adjusted to obtain WO<sub>3</sub>-t1 (8 h), WO<sub>3</sub>-t2 (12 h) and WO<sub>3</sub>-t3 (24 h) nanorods. Here, WO<sub>3</sub>-T2 is WO<sub>3</sub>-C2 and WO<sub>3</sub>-T3 is WO<sub>3</sub>-t2.

##### (ii) WS<sub>2</sub> nanosheets.

When millimolar ratios of C<sub>2</sub>H<sub>5</sub>NS to WCl<sub>6</sub> is 20 : 2, WS<sub>2</sub> nanosheets were prepared at different temperatures for varying reaction time, respectively. WS<sub>2</sub>-T1, WS<sub>2</sub>-T2, WS<sub>2</sub>-T3, WS<sub>2</sub>-T4 and WS<sub>2</sub>-T5

nanosheets were obtained at 160 °C, 180 °C, 220 °C, 240 °C and 260 °C for 12 h, respectively. WS<sub>2</sub>-t1, WS<sub>2</sub>-t2 and WS<sub>2</sub>-t3 nanosheets were prepared at 240 °C for 12 h, 18 h and 24 h, respectively. Here, WS<sub>2</sub>-t1 is WS<sub>2</sub>-T4. At 240 °C, different the millimolar ratios of C<sub>2</sub>H<sub>5</sub>NS to WCl<sub>6</sub> were used as reactant for a 12 h hydrothermal reaction. WS<sub>2(7:1)</sub>-240°C, WS<sub>2(8:1)</sub>-240°C, WS<sub>2(9:1)</sub>-240°C, WS<sub>2(10:1)</sub>-240°C were obtained.

(iii) WS<sub>x</sub>O<sub>y</sub> nanocomposites

*Cooling treatment.* Keeping other hydrothermal conditions consistent with WO<sub>3</sub>-C2, the WSO<sub>5:1</sub>-180 °C and WSO<sub>5:1</sub>-160 °C were obtained under 180 °C and 160 °C, respectively.

*Adding S source.* WSO<sub>6:1</sub>-160 °C was obtained by adding S source on the basis of WSO<sub>5:1</sub>-160 °C.

The Fig. S1 summarizes the types of samples obtained under different hydrothermal conditions. It is clear that the sample composition and structure can be regulated by the reactant ratio (C<sub>2</sub>H<sub>5</sub>NS : WCl<sub>6</sub>) and the hydrothermal temperature.

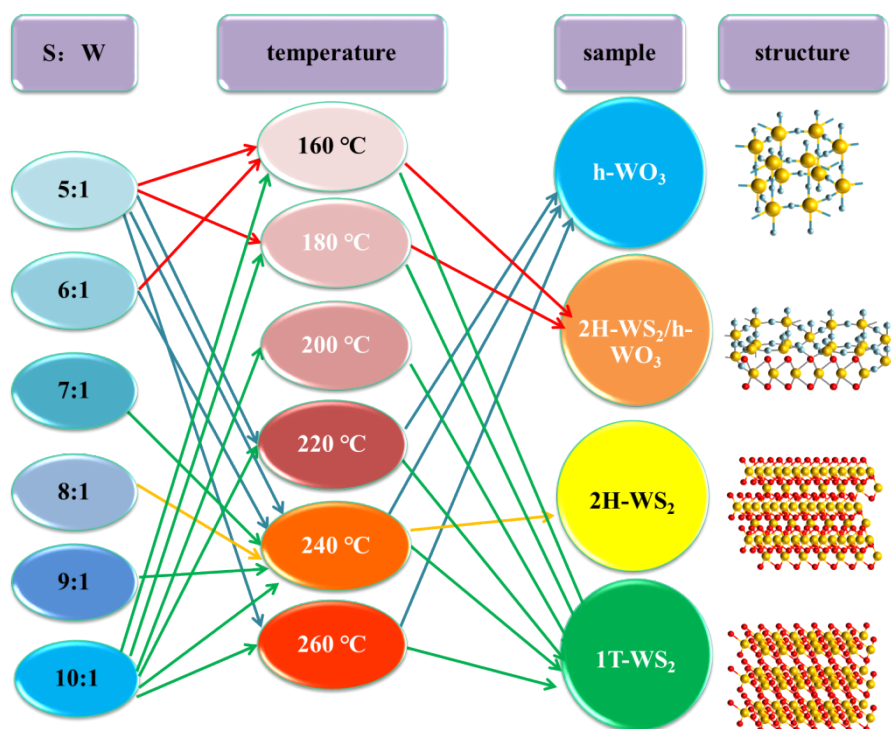

Fig. S1 Summary of experimental conditions.

## 2. Different morphologies and compositions under different hydrothermal conditions

### (i) WO<sub>3</sub> nanorods.

The SEM images of WO<sub>3</sub>-C1-C3, WO<sub>3</sub>-T1-T3 and WO<sub>3</sub>-t1-t3 were shown in Fig. S2 (a<sub>i</sub>-a<sub>iii</sub>, b<sub>i</sub>-b<sub>iii</sub> and c<sub>i</sub>-c<sub>iii</sub>). All EDS images (Fig. S2 (a<sub>iv</sub>-c<sub>iv</sub>)) showed W and O elements, indicating that the samples are composed of tungsten oxide. S mostly existed in the solution in the form of SO<sub>4</sub><sup>2-</sup>, which assists the formation of 1D h-WO<sub>3</sub> nanorods. The above results showed that 1D WO<sub>3</sub> nanorods are obtained at high temperature (220 °C-240 °C) under S : W = 5 : 1.

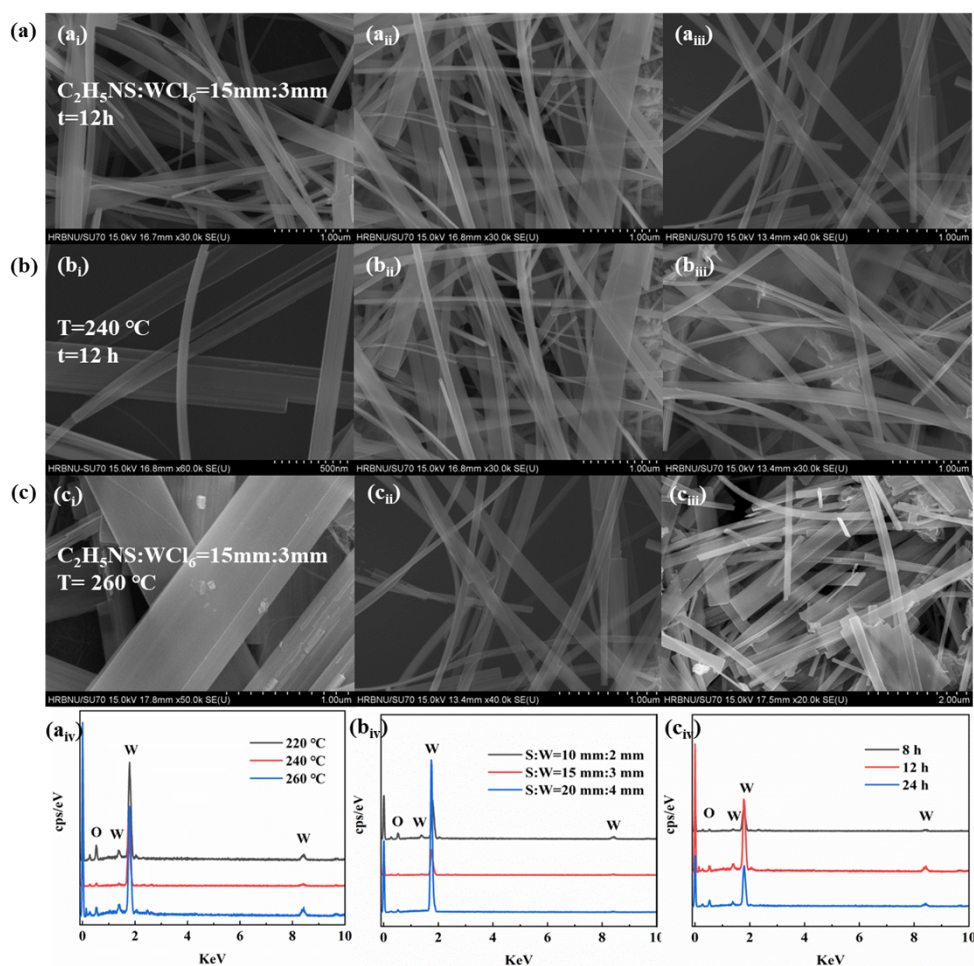

Fig. S2 SEM and EDS images of samples, which hydrothermal reactions at different temperatures (a), reactant concentration (b) and reaction time (c).

### (ii) WS<sub>2</sub> nanosheets.

The SEM images of WS<sub>2</sub>-T1-T5 and WS<sub>2</sub>-t1-t3 were shown in Fig. S3 (a<sub>i</sub>-a<sub>v</sub> and b<sub>i</sub>-b<sub>iii</sub>), indicating that the samples were all composed of nanoflowers spontaneously aggregated by nanosheets. All EDS images (Fig. S3 (a<sub>vi</sub>, b<sub>iv</sub>)) shown W and S elements, indicating that the samples were composed of tungsten sulfide. Fig. S3 (c) showed the formation process of WS<sub>2</sub> nanoflowers. The short WO<sub>3</sub> nanosheets were still formed first during the early stage of the hydrothermal reaction, and were sulfided into dispersed WS<sub>2</sub> nanosheets before the WO<sub>3</sub> nanorods aggregate into clusters. As the nanosheets gradually grow, WS<sub>2</sub> can spontaneously agglomerate to form WS<sub>2</sub> nanoflowers on the basis of uniform nanosheets.

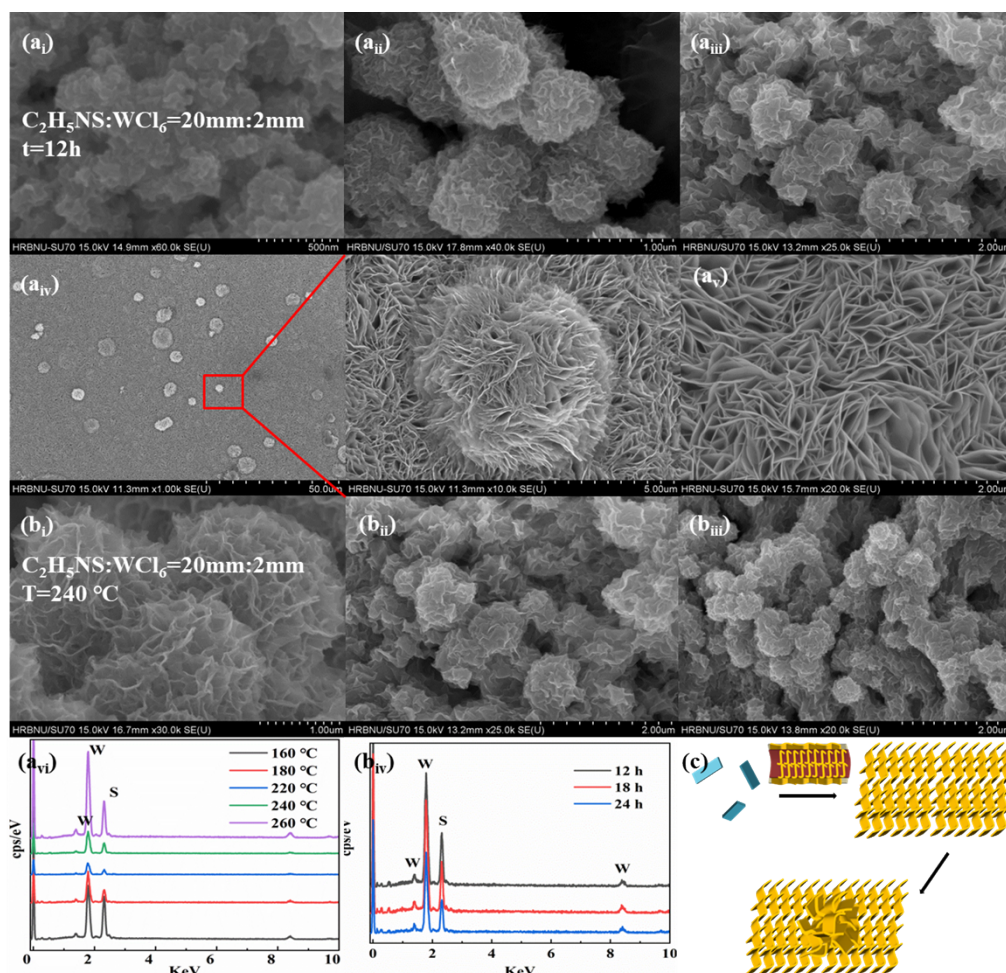

Fig. S3 SEM and EDS images of samples, which hydrothermal reactions at different temperatures (a) and reaction time (b), the formation process of WS<sub>2</sub> nanoflowers (c).

(iii)  $WS_xO_y$  nanocomposites

The SEM images of  $WS_xO_{y(6:1)}$ -160 °C were displayed in Fig. S4 (a). It was obvious that the samples were composed of nanorod clusters ( $WO_3$ ) and nanoflowers ( $WS_2$ ). To explore changes in the elemental composition of the samples, the EDS images were shown in the Fig. S4 (b). The result showed that the sample was composed of S, W, O elements, and the content of S element in the sample was increased compared with  $WS_xO_{y(5:1)}$ -160 °C, indicating that increasing the concentration of S source in the reactant will result in more  $WO_3$  being sulfided. In the Fig. S4 (c),  $WS_xO_{y(6:1)}$ -160 °C exhibited the same diffraction peaks as  $WS_xO_{y(5:1)}$ -160 °C, illustrating that  $WS_xO_{y(6:1)}$ -160 °C consisted of h- $WO_3$  and 2H- $WS_2$ . The Fig. S4 (d-f) showed a structure of nanosheet-wrapped nanorod cluster. EDS elemental mapping images showed that nanorods were mainly composed of W, O elements and nanosheets were mainly composed of W, S elements (Fig. S4 (e)). The TEM image of a single  $WO_3$  nanorod was magnified in Fig. S4 (g). The nanorods were having lattice fringe width of ~0.617 nm corresponding to (100) crystal planes of  $WO_3$ . The lattice spacing of adjacent nanosheets was observed to be 0.265 nm, which was attributed to the (101) crystal planes of  $WS_2$ . The lattices of the two were tightly connected, indicating that  $WO_3$  acted as a template during the vulcanization process.

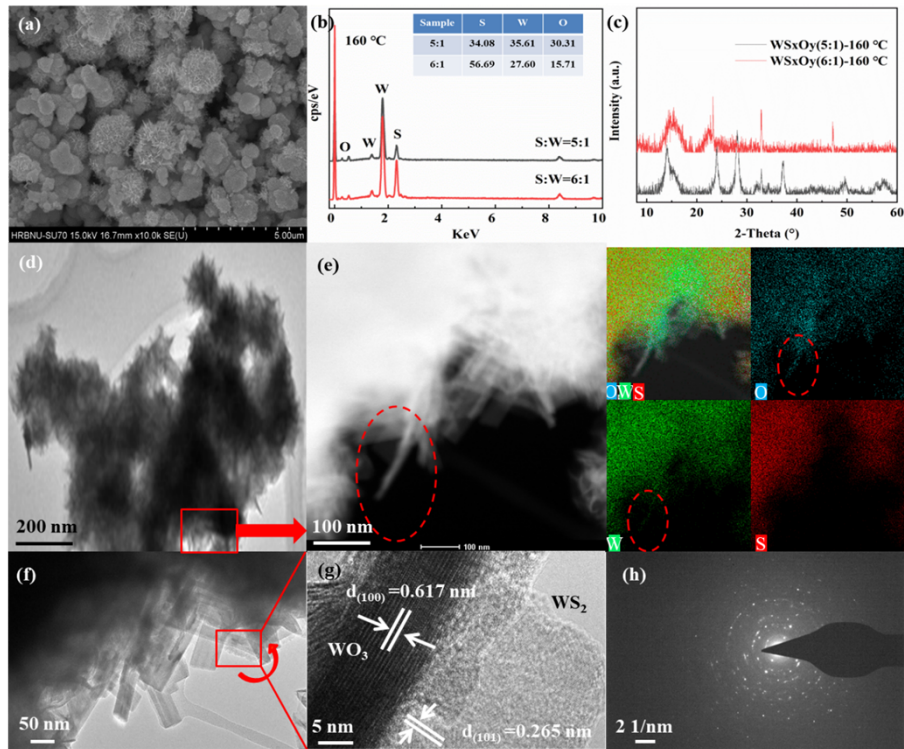

Fig. S4 SEM (a), EDS (b), XRD (c) and TEM (d-h) images of  $WS_xO_y(6:1)-160\text{ }^\circ\text{C}$ .

### 3. The property analysis.

#### (i) Raman analysis

In Fig. S5 (a), Raman vibration peak of  $WO_3(5:1)-240\text{ }^\circ\text{C}$  and  $WO_3(6:1)-240\text{ }^\circ\text{C}$  located at  $96\text{ cm}^{-1}$ , the range of  $150\text{--}330\text{ cm}^{-1}$  and  $\sim 717\text{ cm}^{-1}$ , corresponding to the lattice vibration, the weak bending vibration of  $\delta(\text{O-W-O})$  and the stretch vibration of  $\nu(\text{O-W-O})$  respectively. In Fig. S5 (b), the two vibrational peak of  $WS_2$  located at  $\sim 400\text{ cm}^{-1}$  were sharp, indicating that the vibrational mode of  $WS_2$  was stronger in  $WS_xO_y$ . At the same time, the  $\nu(\text{O-W-O})$  peaks of  $WO_3$  were also enhanced, which may be due to the interaction between  $WS_2$  and  $WO_3$ . In Fig. S5 (c), the  $E_{2g}^1$  and  $A_{1g}$  vibration peaks of  $WS_2$  appeared at  $\sim 350$  and  $420\text{ cm}^{-1}$ , revealing that the sample was pure  $WS_2$ .

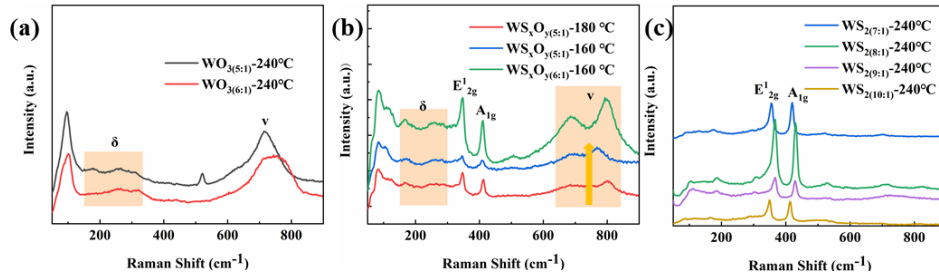

Fig. S5 Raman images of (a)  $\text{WO}_3$ , (b)  $\text{WS}_x\text{O}_y$  and (c)  $\text{WS}_2$ .

### (ii) UV-vis analysis

The UV-vis spectrum of  $\text{WO}_3$ ,  $\text{WS}_x\text{O}_y$  and  $\text{WS}_2$  were displayed in Fig. S6 (a-c), respectively. In Fig. S6 (a), the absorption peaks of  $\text{WO}_3$  at 220 nm and 280 nm originated from the internal charge transfer of  $[\text{WO}_6]$  octahedra. An absorption peak of  $\text{WO}_3$  appeared at 250 nm, it can be speculated that the peak comes from  $\text{O}_v$  in  $\text{WO}_3$ . In Fig. S6 (b), the peak originated from  $\text{O}_v$  of  $\text{WO}_3$  at 250 nm disappeared and the peak located at 260 nm from B excitons of  $\text{WS}_2$  was increased with the strengthening of vulcanization. It was clear that the absorption of the  $\text{WS}_x\text{O}_y$  in the visible range was significantly enhanced. In Fig. S6 (c), the 260 nm peak originated from B absorption of  $\text{WS}_2$ .

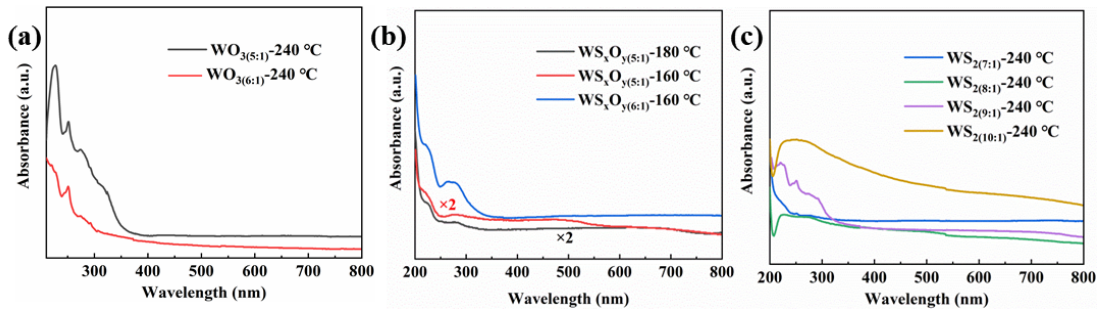

Fig. S6 UV-vis images of  $\text{WO}_3$  (a),  $\text{WS}_x\text{O}_y$  (b) and  $\text{WS}_2$  (c).

### (iii) PL analysis

In Fig. S7 (a), the emission peaks of  $\text{WO}_3$  located at 416 nm, 553 nm and 760-820 nm, corresponding to interband transition, defect state and phonons luminescence with indirect transitions. In Fig. S7 (b), luminescence behavior and intensity are regulated by the sulfidation, due to the situation of  $\text{O}_v$  and S substitution during the sulfidation process. In Fig. S7 (c), the constant energy difference between A and

B is  $\sim 0.4$  eV, independent of the layer number.

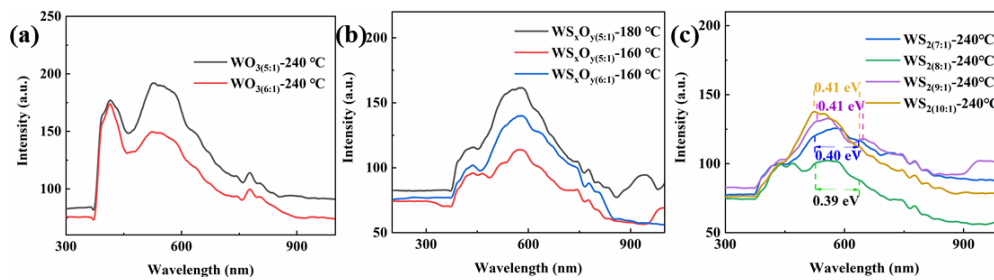

Fig. S7 PL images of  $\text{WO}_3$  (a),  $\text{WS}_x\text{O}_y$  (b) and  $\text{WS}_2$  (c).
